# Supplementary material for: Synthesis and characterization of V2O3 nanorods
Source: Royal Society of Chemistry journal article supplement (doi:10.1039/b822902c), 2009-01-01
Supplement: b822902c.pdf [file b822902c.pdf]

Supplementary Material (ESI) for *PCCP*  
This journal is © the Owner Societies 2009

Supplementary Information for

**Synthesis and Characterization of V<sub>2</sub>O<sub>3</sub> nanorods**

Alexander Santulli<sup>1</sup>, Wenqian Xu<sup>2</sup>, John B. Parise<sup>1,2</sup>, Liusuo Wu<sup>3</sup>, M.C. Aronson<sup>3,4</sup>,

Fen Zhang<sup>1</sup>, Chang-Yong Nam<sup>5</sup>, Charles T. Black<sup>5</sup>, Amanda Tiano<sup>1</sup>,

and Stanislaus S. Wong<sup>1,3,\*</sup>

Email: [sswong@notes.cc.sunysb.edu](mailto:sswong@notes.cc.sunysb.edu); [sswong@bnl.gov](mailto:sswong@bnl.gov)

<sup>1</sup>Department of Chemistry, State University of New York at Stony Brook, Stony Brook, NY 11794-3400

<sup>2</sup>Department of Geosciences, State University of New York at Stony Brook, Stony Brook, NY 11794-2100

<sup>3</sup>Condensed Matter Physics and Materials Sciences Department, Brookhaven National Laboratory, Upton, NY 11973

<sup>4</sup>Department of Physics and Astronomy, State University of New York at Stony Brook, Stony Brook, NY 11794-3800

<sup>5</sup>Center for Functional Nanomaterials, Brookhaven National Laboratory, Upton, NY 11973

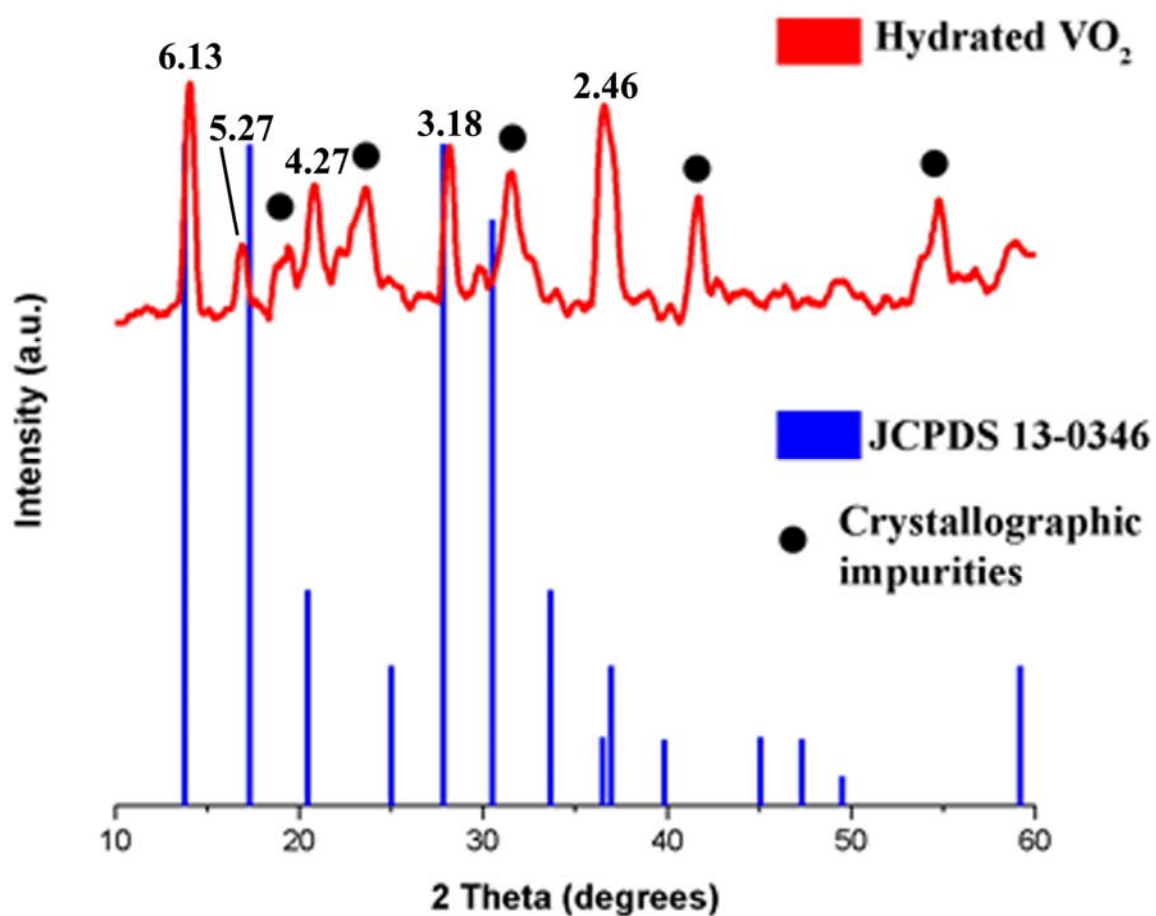

**Supplementary Figure S1.** Powder XRD pattern (red) of our hydrated VO<sub>2</sub> hydrate precursor nanorods and the corresponding JCPDS #13-0346 (blue). Numbers in Angstroms indicate *d*-spacings associated with expected powder diffraction peaks, shown immediately below. Crystallographic impurities associated with V<sub>6</sub>O<sub>13</sub> and V<sub>4</sub>O<sub>7</sub> are denoted by black dots.
